# Supplementary material for: Genome-Wide Identification and Characterization of the GRF Gene Family in Melastoma dodecandrum
Source: MDPI journal article supplement (doi:10.3390/ijms24021261), 2023-01-09
Supplement: s1 [file s1]

**Table S1.** The primers for RT-qPCR, the *MdACT* was the reference gene.

| Gene name      | Primer  | Sequence              |
|----------------|---------|-----------------------|
| <i>MdGRF1</i>  | Forward | AGTCCTTCGCCACTTCTTCG  |
|                | Reverse | TTTCTGGCGGTTCGACATTGA |
| <i>MdGRF2</i>  | Forward | TGCATCCCTTTCCATCTCGT  |
|                | Reverse | GCACTGGGATAAGCATTGCC  |
| <i>MdGRF3</i>  | Forward | AGCCTGTGGAAACAACCTCCG |
|                | Reverse | GCATTGCAGGCTGATGAGGA  |
| <i>MdGRF7</i>  | Forward | TCGACCACAAAGTCGGATGT  |
|                | Reverse | GAGGGCACTTCCAACACCTA  |
| <i>MdGRF15</i> | Forward | GAGCGTCACTCCCACAAGAA  |
|                | Reverse | AGCAGGGTTGAGGAGGTAGT  |
| <i>MdGRF19</i> | Forward | AAAGCCTGTGGAAGGCCAAA  |
|                | Reverse | AGCAGAGGAAACTGCAGACA  |
| <i>MdACT</i>   | Forward | TGCCCTTGACTATGAACAGG  |
|                | Reverse | GAATCTCTCAGCACCAATCG  |
